# Supplementary material for: Cerebral perivascular spaces as predictors of dementia risk and accelerated brain atrophy
Source: bioRxiv or medRxiv preprint supplement (doi:10.1101/2024.04.25.24306324), 2024-04-26
Supplement: Supplementary file [file media-1.pdf]

# 1 Supplementary figures

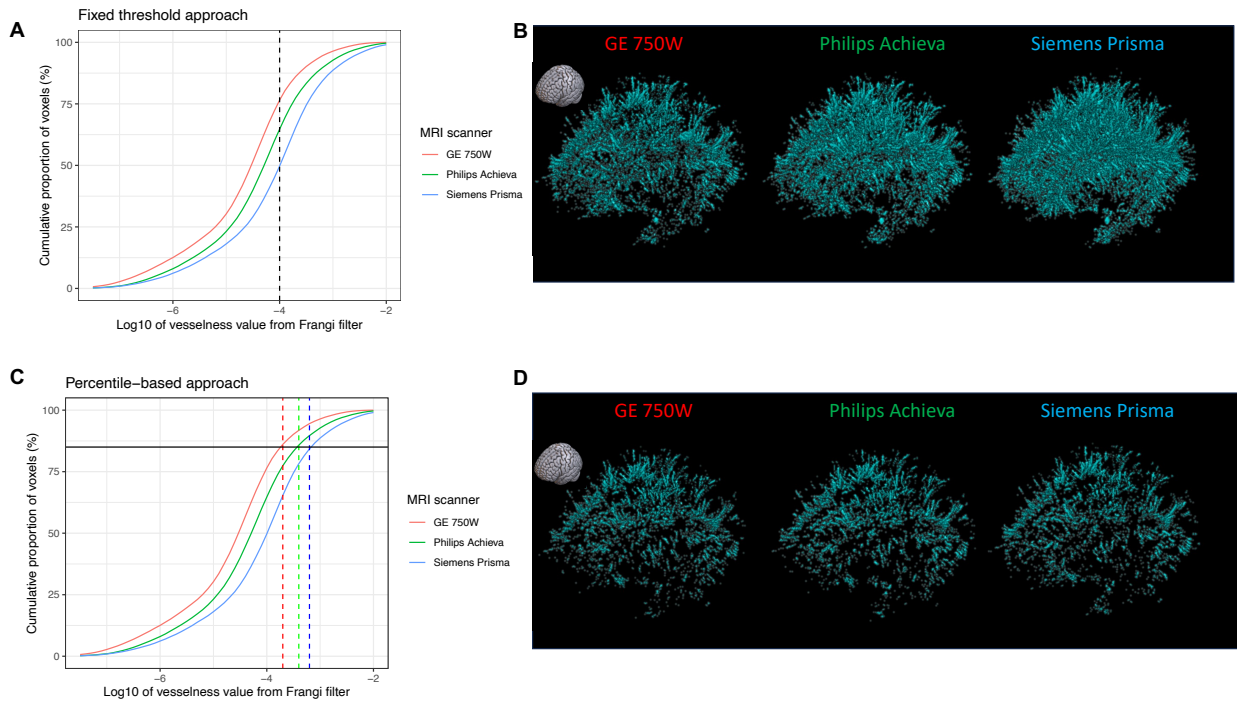

2  
3 **Figure S1. Cumulative distributions of the voxel values from three vesselness**  
4 **maps generated with the Frangi filter applied on three different T1-weighted brain**  
5 **images acquired on the same participant with three different MRI scanners.**  
6 The original approach requires to set a single threshold (black vertical dashed line in  
7 panel A, in this case equal to  $10^{-4}$ ), and to use this threshold to segment vessel-like  
8 structures (Panel A). However, this approach lacks inter-scanner reproducibility,  
9 because the scale of the vesselness maps depends on the signal intensity of the input  
10 image, which may differ among MRI scanners and protocols. In fact, in this example the  
11 threshold would lead to very different number of segmented voxels: vessel-like masks  
12 from Siemens scanner will have approximately 12.5 and 25% more voxels than those  
13 from Philips and GE scanners, respectively (Panel B). In our novel approach, we set  
14 specific thresholds to the individual images (vertical dashed lines, red for the GE-  
15 derived image, green for the Philips-derived image, and blue for the Siemens-derived  
16 image) based on the value of the voxel corresponding to the 85<sup>th</sup> percentile (black  
17 horizontal solid line) of the total number of non-zero voxels of the vesselness map  
18 (Panel C). This approach leads to consistent PVS masks (Panel D) and robust metrics  
19 derived from the PVS masks (Figures S2 A-C and S4), while preserving inter-individual  
20 differences and accuracy (Figure S2 D-F and S3).  
21 Panels B and D report the 3D representations of the PVS segmentation masks of the  
22 same participant obtained with 3 different MRI scanners with fixed threshold approach  
23 (panel B) and our novel percentile-based approach (panel D). The small brain icon on  
24 the top left of each panel indicates the orientation of the PVS masks.

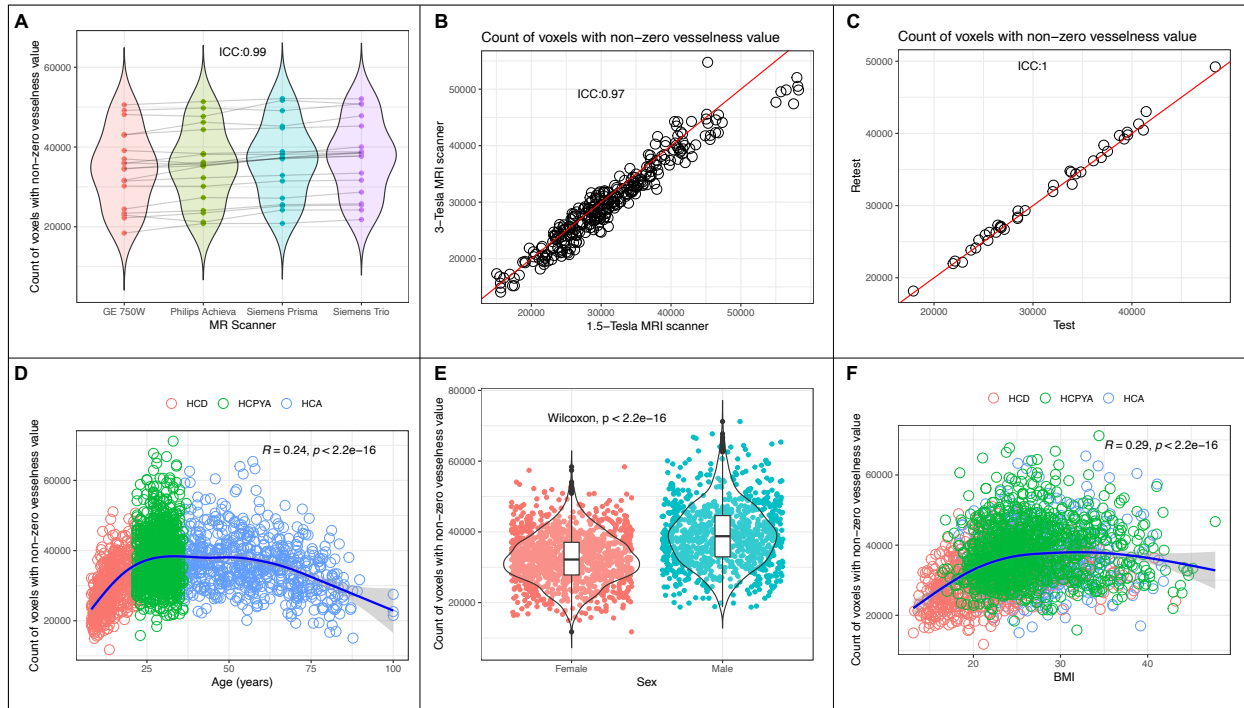

25  
26  
27  
28  
29  
30  
31  
32  
33  
34  
35  
36  
37  
38  
39  
40  
41  
42  
43  
44  
45  
46  
47  
48  
49  
50

**Figure S2. Reproducibility and associations of the total number of non-zero voxels in the vesselness maps generated with the Frangi filter.**

The total number of non-zero voxels in the vesselness maps generated with the Frangi filter shows excellent inter-scanner (panel A) and inter-field-strength (panel B) reproducibility and test-retest repeatability (panel C). The total number of non-zero voxels in the vesselness maps generated with the Frangi filter is significantly associated with age (panel D), sex (panel E), and body mass index (BMI, panel F), and these associations are consistent with what previously published on MRI-visible vascular and perivascular spaces.<sup>21–23</sup> Therefore, it is possible to use a percentile-based approach for segmenting MRI-visible vessel-like structures (Figure S1 B), as the inter-individual differences are preserved. In panel A, data are from 19 subjects who underwent four brain MRI scans within an interval of 3 to 90 days on four different 3-Tesla MRI scanners (General Electric system 750W, Philips Achieva dStream, Siemens Prisma, and Siemens TIM Trio) from MarkVCID dataset. In panel B, data are from 299 MRI sessions from 115 ADNI participants who underwent in each session two brain MRI scans on the same day with a 1.5- and a 3-Tesla scanner. In panel C, data are from 39 participants (MarkVCID) who underwent two brain MRI scans on the same MRI scanner using the same protocol within an interval of 1 to 14 days. In panels D-F, data are from 2163 subjects from the Human Connectome Project Aging (HCA), Development (HCD) and Young Adults (HCPYA) datasets. See also Table S17 and S18 for their demographic and radiographic characteristics, respectively. ICC: Intraclass correlation coefficient. R in panels B and F is the Spearman's rho. The red lines in panels B and C are the identity lines. The blue lines in panels D and F have been generated with locally estimated smoothing.

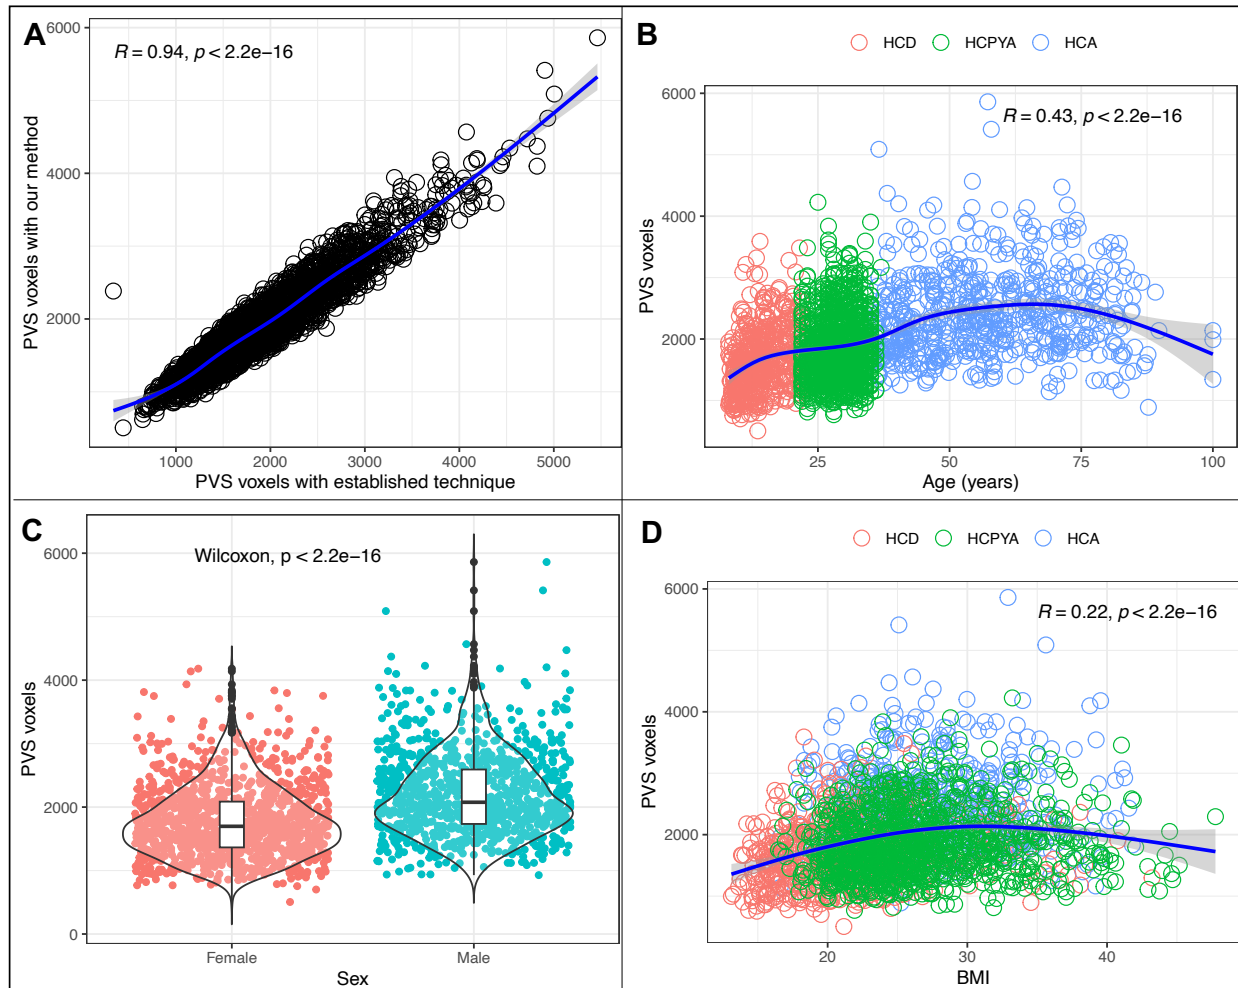

51  
52  
53  
54  
55  
56  
57  
58  
59  
60  
61  
62  
63

**Figure S3. Reliability of PVS segmentation.**

There was a strong correlation (panel A) between the numbers of PVS voxels identified with our fully automated technique (y-axis) and those obtained with the established and previously validated method<sup>12,21-23</sup> (x-axis). The average Dice similarity coefficient was 0.95. Consistently, PVS measured with our method also showed a significant positive association with age (panel B), male sex (panel C), and body mass index (panel D), as previously published with the validated semi-automated techniques in the Human Connectome Project datasets<sup>21-23</sup>. R in panels B and D is the Spearman's rho. Data are from 2163 subjects from the Human Connectome Project Aging (HCA), Development (HCD) and Young Adults (HCPYA) datasets. The blue lines in panels B and D have been generated with locally estimated smoothing.

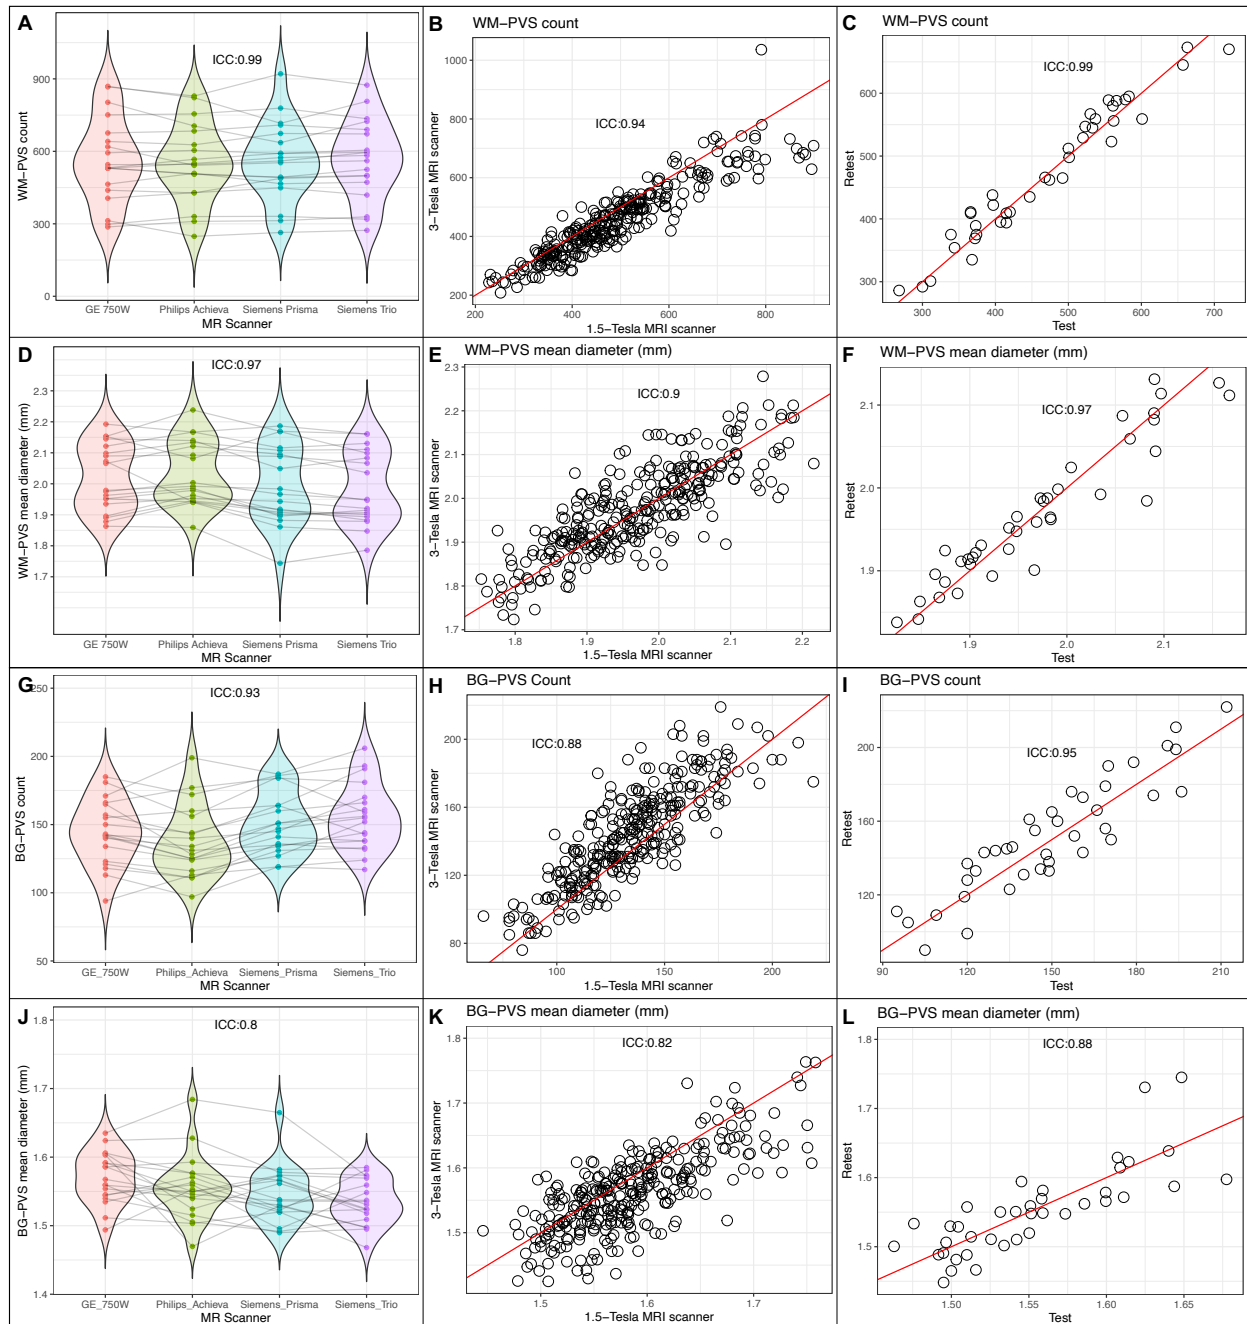

64  
65  
66  
67  
68  
69  
70  
71  
72  
73  
74

**Figure S4. Reproducibility of PVS count and diameter computed on the binary MRI-visible vascular and perivascular spaces masks obtained with our novel approach.**

The PVS count (panels A-C for WM-PVS and G-I for BG-PVS) and PVS mean diameter (panels D-F for WM-PVS and J-L for BG-PVS) computed on the binary PVS masks obtained with our novel approach show excellent inter-scanner (panels A and D for WM-PVS and panels G and J for BG-PVS, respectively) and inter-field-strength (panels B and E for WM-PVS and panels H and K for BG-PVS, respectively) reproducibility and test-retest repeatability (panels C and F for WM-PVS and panels I and L for BG-PVS, respectively). In panels A, D, G and J data are from 19 subjects who underwent four

75 brain MRI scans within an interval of 3 to 90 days on four different 3-Tesla MRI  
76 scanners (General Electric system 750W, Philips Achieva dStream, Siemens Prisma,  
77 and Siemens TIM Trio) from MarkVCID. In panels B, E, H and K data are from 299 MRI  
78 sessions from 115 ADNI participants who underwent in each session two brain MRI  
79 scans on the same day with a 1.5- and a 3-Tesla scanner. In panels C, F, I and L data  
80 are from 39 participants (MarkVCID) who underwent two brain MRI scans on the same  
81 MRI scanner using the same protocol within an interval of 1 to 14 days. See also Table  
82 S17 and S18 for their demographic and radiographic characteristics, respectively. The  
83 red lines in panels B, C, E, F, H, I, K and L are the identity lines. ICC: Intraclass  
84 correlation coefficient.

85  
86  
87  
88  
89

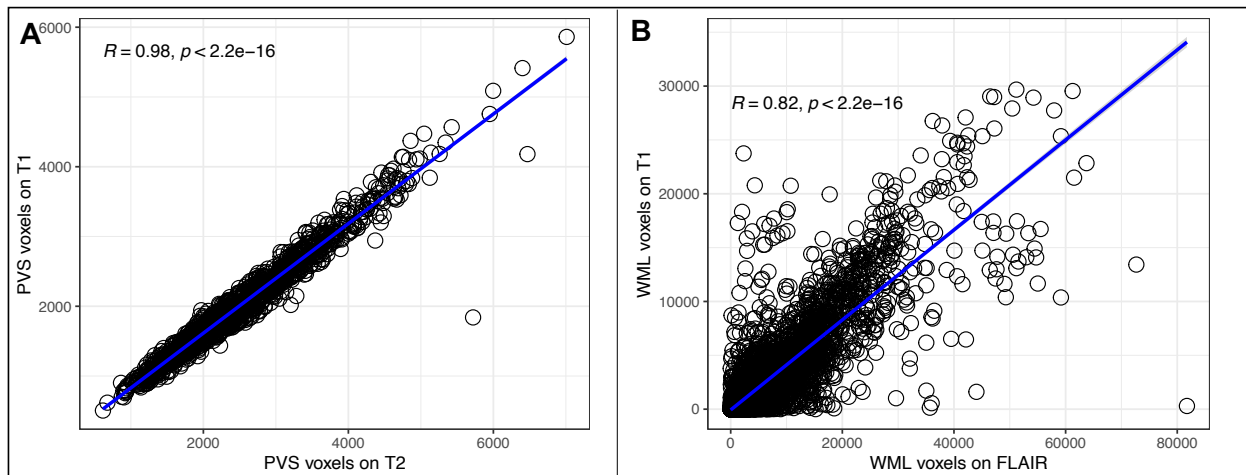

90  
91 **Figure S5. Suitability of T1-weighted images for the assessment of PVS and WML.**  
92 The number of PVS voxels identified by our novel algorithm (panel A) and of WML  
93 voxels identified with an established technique<sup>24</sup> (panel B), both applied on T1-weighted  
94 images (y-axis), are strongly correlated with those identified by the same algorithms  
95 applied on sequences considered more sensitive for PVS (T2-weighted images) and  
96 WML (FLAIR). R in panels A and B is the Spearman's rho. Data are from 1341 subjects  
97 in the Human Connectome Project dataset (panel A) and 6707 MR sessions of 1889  
98 subjects in ADNI (panel B).

99  
100  
101

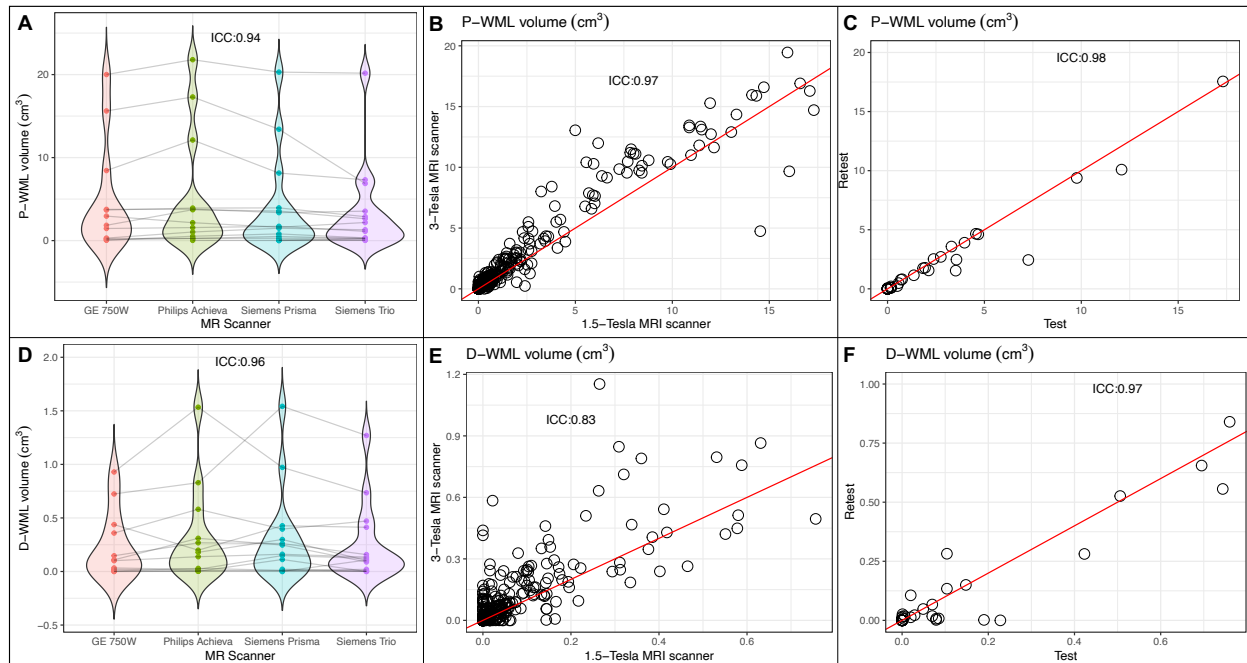

102  
 103  
 104  
 105  
 106  
 107  
 108  
 109  
 110  
 111  
 112  
 113  
 114  
 115  
 116  
 117  
 118  
 119  
 120

**Figure S6. Reproducibility of WML volume computed with a validated technique applied on T1-weighted images.**

The WML volumes (panels A-C for periventricular WML, P-WML, and D-F for deep WML, D-WML) computed with a validated approach<sup>24</sup> show excellent inter-scanner (panels A and D for P-WML and D-WML, respectively) and inter-field-strength (panels B and E for P-WML and D-WML, respectively) reproducibility and test-retest repeatability (panels C and F for P-WML and D-WML, respectively). In panels A and D data are from 19 subjects who underwent four brain MRI scans within an interval of 3 to 90 days on four different 3-Tesla MRI scanners (General Electric system 750W, Philips Achieva dStream, Siemens Prisma, and Siemens TIM Trio) from MarkVCID dataset. In panels B and E data are from 308 MRI sessions from 116 ADNI participants who underwent in each session two brain MRI scans on the same day with a 1.5- and a 3-Tesla scanner. In panels C, F, I and L data are from 39 participants (MarkVCID) who underwent two brain MRI scans on the same MRI scanner using the same protocol within an interval of 1 to 14 days. See also Table S17 and S18 for their demographic and radiographic characteristics, respectively. The red lines in panels B, C, E and F are the identity lines. ICC: Intraclass correlation coefficient.

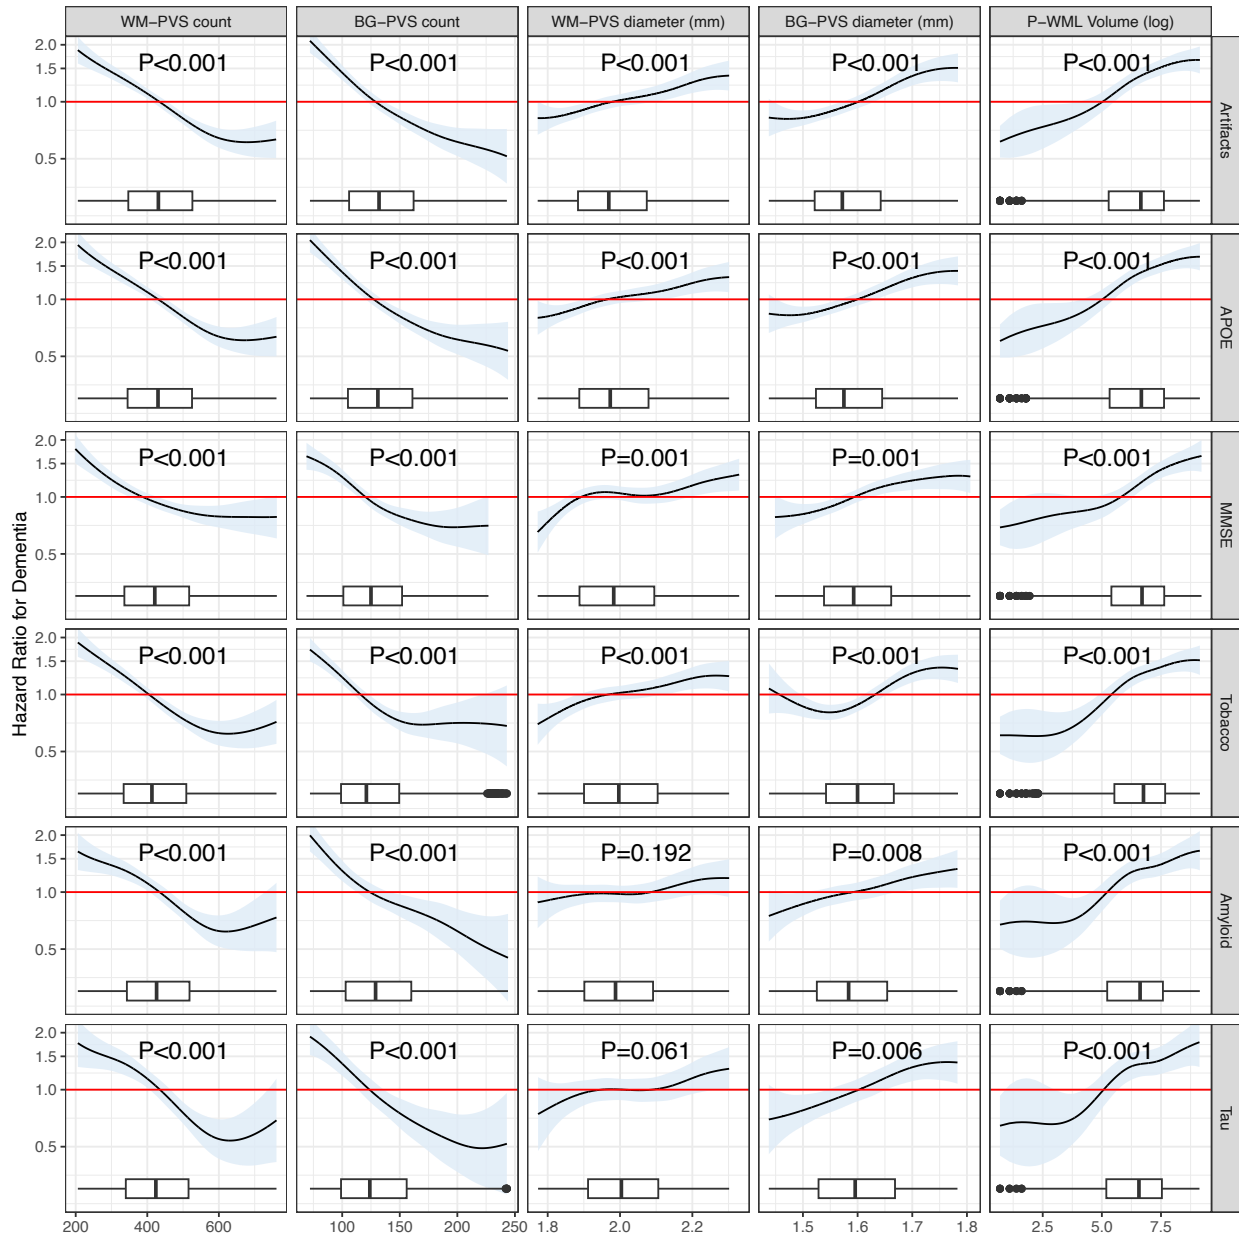

121  
122  
123  
124  
125  
126  
127  
128  
129  
130  
131  
132  
133  
134

**Figure S7. Spline plots for the association of vascular markers with dementia.**

Hazard ratios were estimated from fully adjusted models with the same covariates as in the primary analysis (Fig. 1). For “Artifacts”, MRI data with artifacts that could have affected the estimate of the vascular marker or acquired after the injection of a contrast agent were excluded from the model. For “MMSE” plots, the definition of dementia was based on MMSE score (dementia if MMSE equal to 24 or below) and the covariate “CDR global score at the baseline” has been replaced with “MMSE score at the baseline”. In all the other plots, the indicated variable was included as additional covariate in the model. “APOE” denotes the covariate for Apolipoprotein-E allele genotype, “MMSE” denotes the score from the Mini-Mental State Examination, “Tobacco” denotes history of tobacco smoking (positive or negative), “Amyloid” indicates the status for amyloid-beta pathology as assessed on cerebrospinal fluid and/or positron-emission tomography (positive or negative), and “Tau” indicates the

135 status for tau pathology as assessed on cerebrospinal fluid and/or positron-emission  
 136 tomography (positive or negative). Shaded areas indicate 95% confidence intervals, and  
 137 the red line at 1.0 indicates the reference. The boxplots depict the distributions of the  
 138 marker, with lower and upper hinges corresponding to the first and third quartiles. The  
 139 whiskers extend from the hinge to values no further than 1.5 times the interquartile  
 140 range from the hinge. Dots indicate values that are farther than 1.5 times the  
 141 interquartile range. Limits of the plots are from 2.5th to 97.5th percentile of the  
 142 distribution. Estimated hazard ratios for these models are included in Table S7.  
 143  
 144  
 145

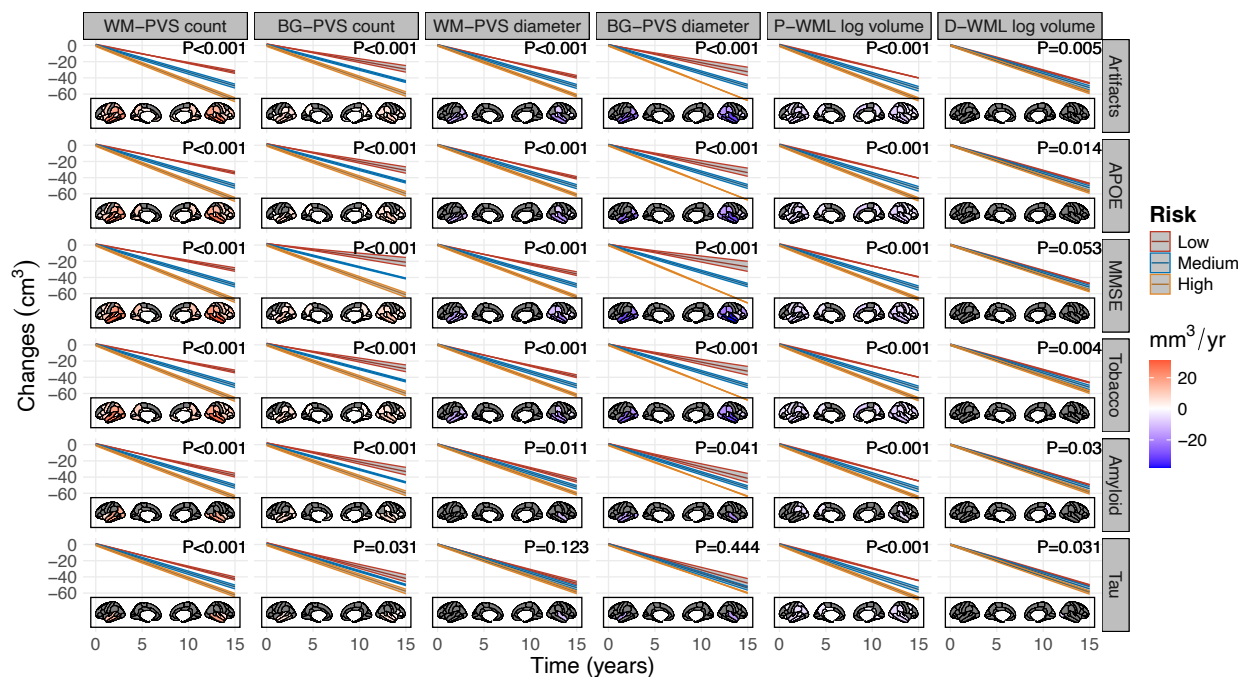

146  
 147 **Figure S8. Sensitivity analyses for the estimated trajectories of grey matter**  
 148 **atrophy in relation to PVS and WML markers.**  
 149 The effects of PVS and WML markers on the trajectories of total grey matter volume  
 150 were estimated from fully adjusted linear mixed-effects models with random intercepts  
 151 and slopes for each individual participant and controlling for the same covariates as in  
 152 the primary analysis (Fig. 2). For “Artifacts”, cases where the estimate of the vascular  
 153 marker may have been affected by MRI artifacts were excluded from the model. For  
 154 “MMSE” plots, the covariate “CDR global score at the baseline” has been replaced with  
 155 “MMSE score at the baseline”. In all the other plots, the indicated variable was included  
 156 as additional covariate in the model. “APOE” denotes the covariate for Apolipoprotein-E  
 157 allele genotype, “MMSE” denotes the score from the Mini-Mental State Examination,  
 158 “Tobacco” denotes history of tobacco smoking (positive or negative), “Amyloid”  
 159 indicates the status for amyloid-beta pathology as assessed on cerebrospinal fluid  
 160 and/or positron-emission tomography (positive or negative), and “Tau” indicates the  
 161 status for tau pathology as assessed on cerebrospinal fluid and/or positron-emission  
 162 tomography (positive or negative). Shaded areas indicate 95% confidence intervals.



163 Three equally spaced values from the low-risk (red), medium-risk (blue), and high-risk  
 164 (yellow) tertile (Table S16) of each vascular marker are shown. See also Table S13 for  
 165 coefficients of sensitivity analysis.

166  
 167

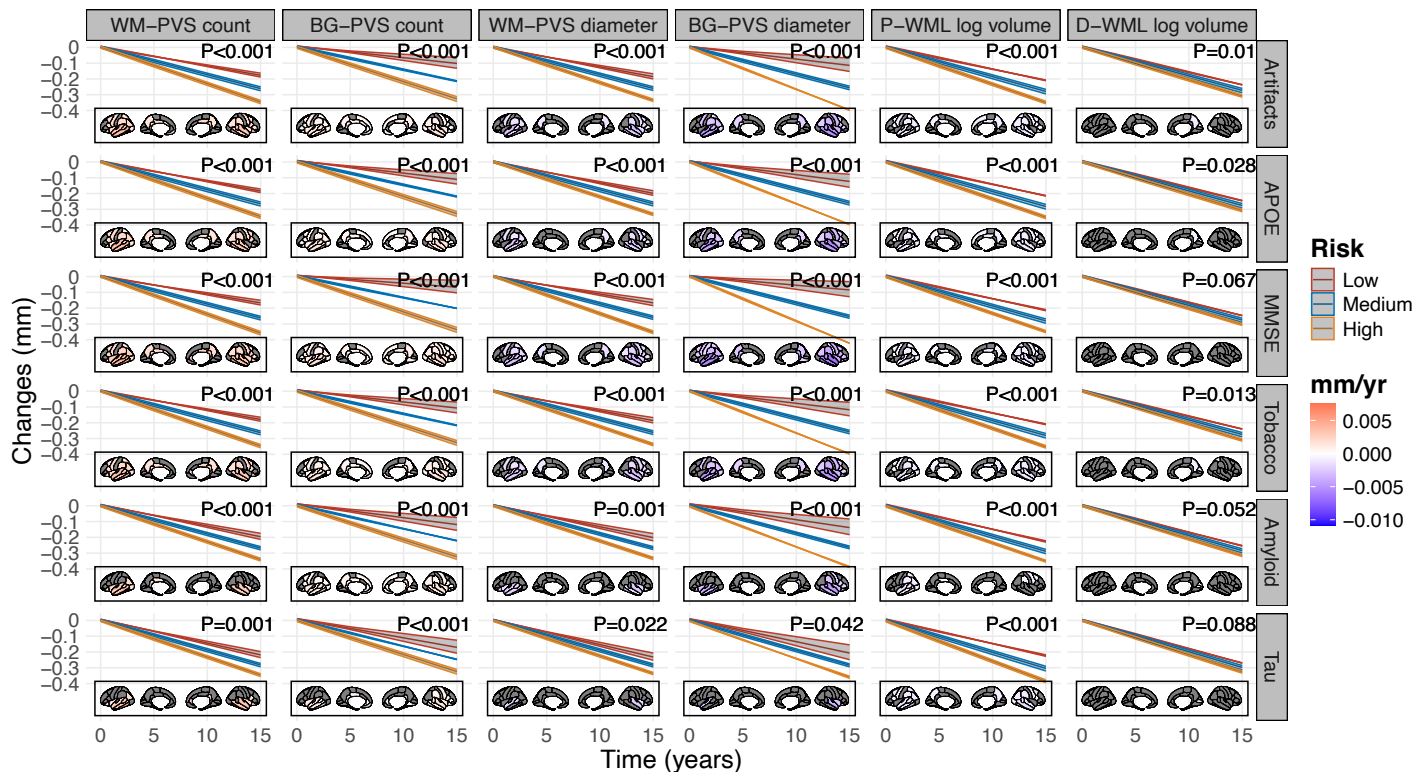

168 **Figure S9. Sensitivity analyses for the estimated trajectories of cortical thickness**  
 169 **atrophy in relation to PVS and WML markers.**

171 The effects of PVS and WML markers on the trajectories of cortical thickness were  
 172 estimated from fully adjusted linear mixed-effects models with random intercepts and  
 173 slopes for each individual participant and controlling for the same covariates as in the  
 174 primary analysis (Fig. 2). For “Artifacts”, cases where the estimate of the vascular  
 175 marker may have been affected by MRI artifacts were excluded from the model. For  
 176 “MMSE” plots, the covariate “CDR global score at the baseline” has been replaced with  
 177 “MMSE score at the baseline”. In all the other plots, the indicated variable was included  
 178 as additional covariate in the model. “APOE” denotes the covariate for Apolipoprotein-E  
 179 allele genotype, “MMSE” denotes the score from the Mini-Mental State Examination,  
 180 “Tobacco” denotes history of tobacco smoking (positive or negative), “Amyloid”  
 181 indicates the status for amyloid-beta pathology as assessed on cerebrospinal fluid  
 182 and/or positron-emission tomography (positive or negative), and “Tau” indicates the  
 183 status for tau pathology as assessed on cerebrospinal fluid and/or positron-emission  
 184 tomography (positive or negative). Shaded areas indicate 95% confidence intervals.  
 185 Three equally spaced values from the low-risk (red), medium-risk (blue), and high-risk  
 186 (yellow) tertile (Table S16) of each vascular marker are shown. See also Table S13 for  
 187 coefficients of sensitivity analysis.

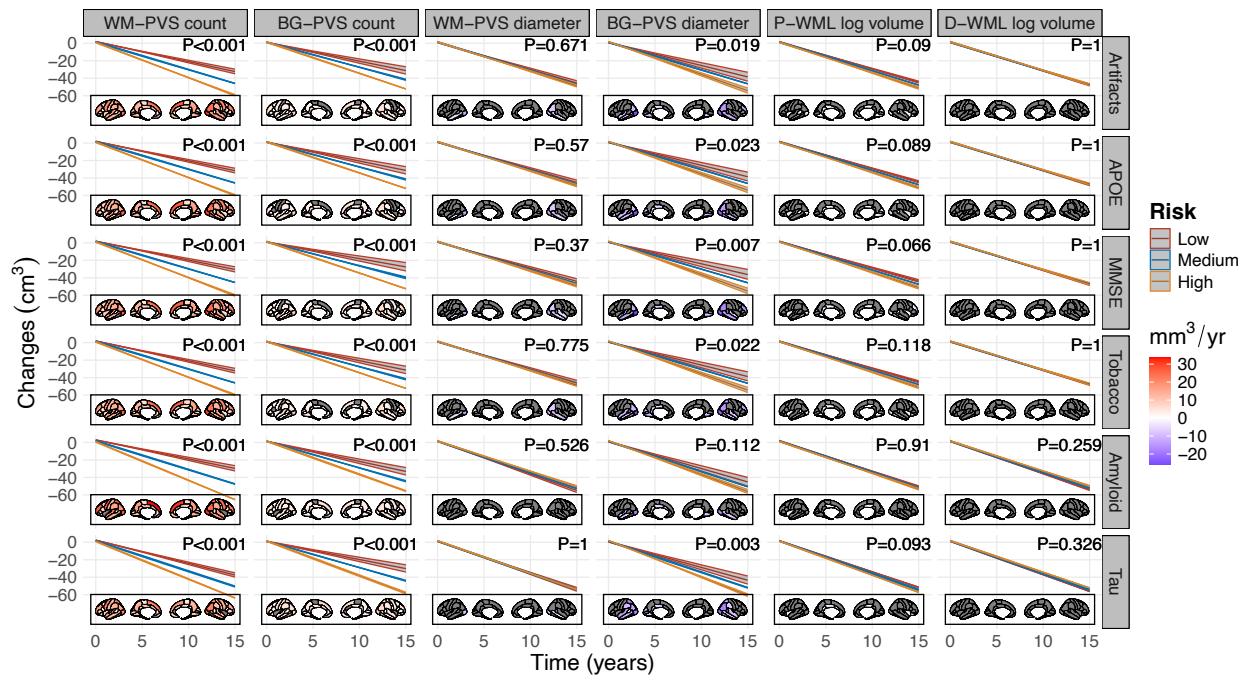

189

190

191

### Figure S10. Sensitivity analyses for the estimated trajectories of white matter atrophy in relation to PVS and WML markers.

192

193

194

195

196

197

198

199

200

201

202

203

204

205

206

207

208

The effects of PVS and WML markers on the trajectories of total white matter volume were estimated from fully adjusted linear mixed-effects models with random intercepts and slopes for each individual participant and controlling for the same covariates as in the primary analysis (Fig. 2). For “Artifacts”, cases where the estimate of the vascular marker may have been affected by MRI artifacts were excluded from the model. For “MMSE” plots, the covariate “CDR global score at the baseline” has been replaced with “MMSE score at the baseline”. In all the other plots, the indicated variable was included as additional covariate in the model. “APOE” denotes the covariate for Apolipoprotein-E allele genotype, “MMSE” denotes the score from the Mini-Mental State Examination, “Tobacco” denotes history of tobacco smoking (positive or negative), “Amyloid” indicates the status for amyloid-beta pathology as assessed on cerebrospinal fluid and/or positron-emission tomography (positive or negative), and “Tau” indicates the status for tau pathology as assessed on cerebrospinal fluid and/or positron-emission tomography (positive or negative). Shaded areas indicate 95% confidence intervals. Three equally spaced values from the low-risk (red), medium-risk (blue), and high-risk (yellow) tertile (Table S16) of each vascular marker are shown. See also Table S13 for coefficients of sensitivity analysis.

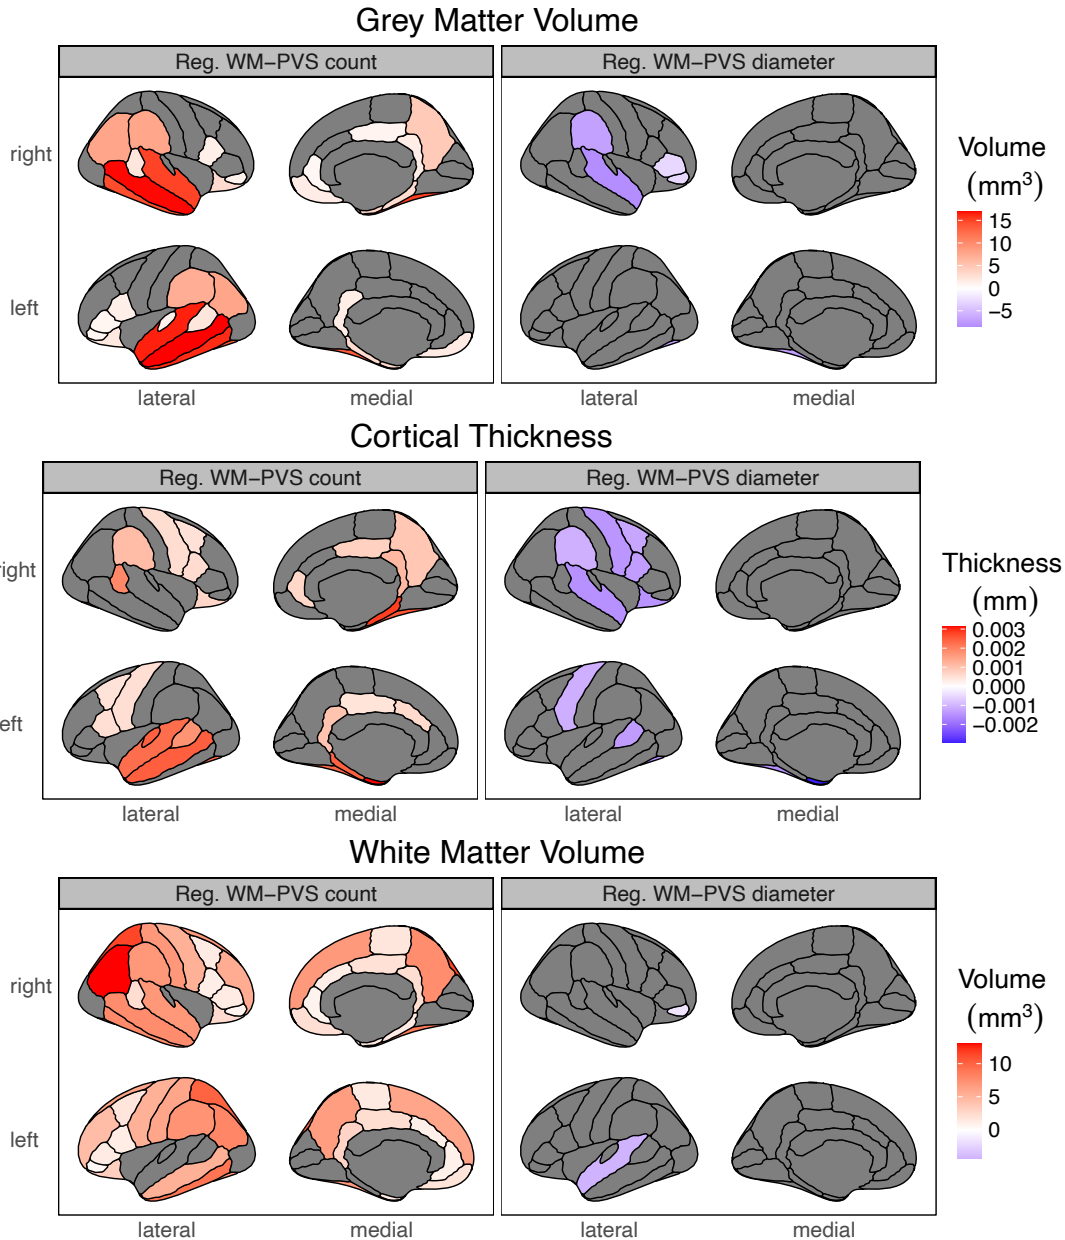

209  
210 **Figure S11. Plots for the effect of baseline WM-PVS measured in individual lobes**  
211 **on the trajectories of atrophy in the corresponding lobe.**

212 The regional analysis across parcellations according to the Desikan-Killiany atlas for the  
213 grey matter (top panels), cortical thickness (middle panels) and white matter (bottom  
214 panels) reports the estimated volume or thickness preserved (positive values in red)  
215 or lost (negative values in blue) per year for each additional unit increase in the PVS count  
216 (left panels) and diameter (right panels) of the corresponding lobe. Only estimated  
217 values for regions that remained statistically significant after correction for multiple  
218 comparisons (68 comparisons) are shown; non-significant regions are greyed out.  
219 Estimates and corrected significance obtained from fully adjusted linear mixed-effects  
220 models with random intercepts and slopes for each individual participant (N=3389 and  
221 14,229 timepoints MRI scans).

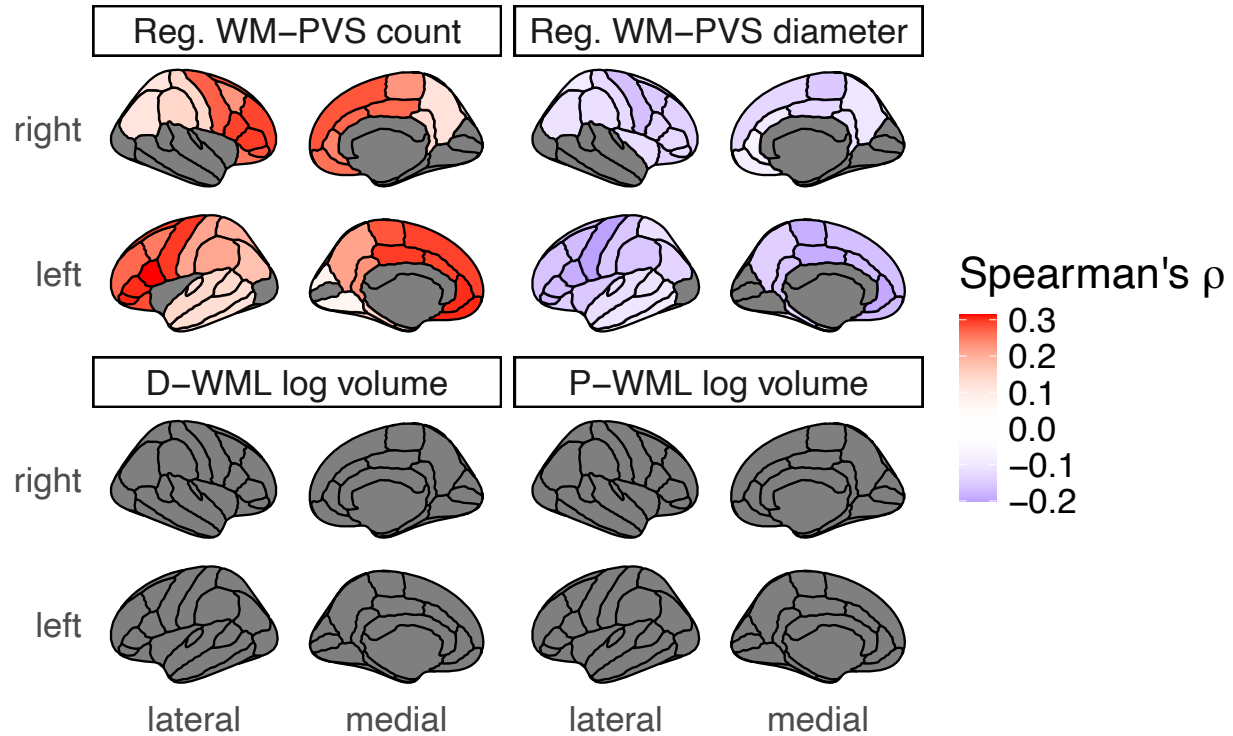

223

224

225

**Figure S12. Plots for the partial correlation between cerebral blood flow and PVS and WML markers.**

226

227

228

229

230

231

232

233

234

235

236

237

238

239

Partial correlation analyses assessing the relationship between PVS/WML markers and cerebral blood flow in non-demented individuals while controlling for age, sex, race, educational level, body mass index, history of diabetes, cardio-/cerebro-vascular disease, hypertension, dyslipidemia, family history of dementia, the employed arterial spin labeling technique, the total intracranial volume and the volume of the region where cerebral blood flow was assessed. Cortical parcellations were performed according to the Desikan-Killiany atlas. For PVS markers, regional PVS count and mean diameter were measured in each lobe and correlated with the cerebral blood flow of the corresponding parcellations. Estimated Spearman's  $\rho$  correlation coefficients are shown for all regions that were statistically significant after corrections for multiple comparisons (68 comparisons), while non-significant regions are greyed out. The analysis was performed on 1072 brain MRI scans with both T1-weighted images and perfusion data available from ADNI dataset.

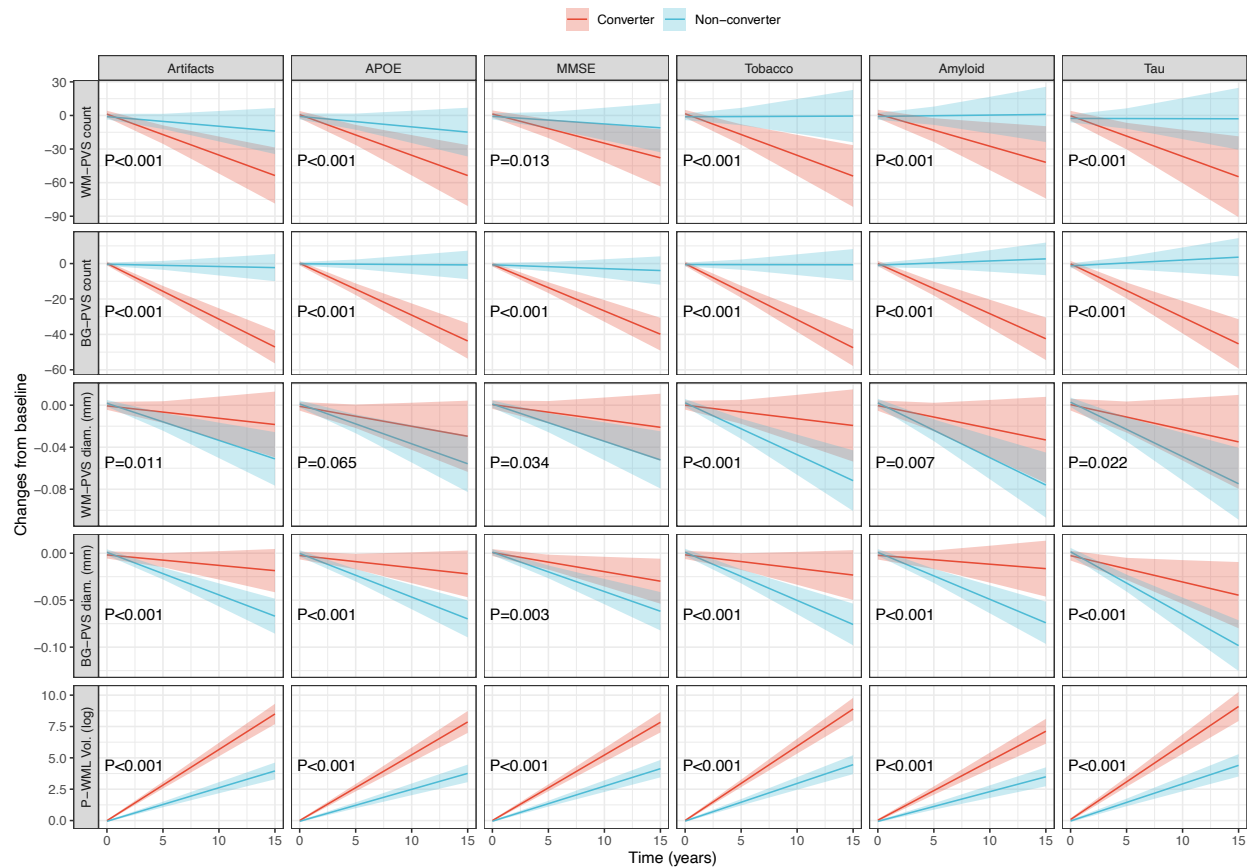

240  
241

242 **Figure S13. Sensitivity analyses for the estimated trajectories of PVS and WML**  
243 **markers in relation to dementia conversion status.**

244 Estimated longitudinal trajectories of WM-PVS, BG-PVS, and P-WML markers for non-  
245 demented individuals who converted to dementia (converters, red) and those that did  
246 not convert to dementia (non-converters, cyan). Shaded areas indicate 95% confidence  
247 intervals. Trajectories are estimated from fully adjusted linear mixed-effect models with  
248 random intercepts and slopes for each individual participant (N=3389 and 14,229  
249 timepoints MRI scans); the adjusted p-values (P) indicate whether the trajectories are  
250 significantly different between the groups after correction for multiple comparisons.  
251 Models included the same covariates as in the primary analysis (Fig. 3). For “Artifacts”,  
252 cases where the estimate of the vascular marker may have been affected by MRI  
253 artifacts were excluded from the model. For “MMSE” plots, the definition of conversion  
254 to dementia was based on MMSE score (dementia if MMSE equal to 24 or below). In all  
255 the other plots, the indicated variable was included as additional covariate in the model.  
256 “APOE” denotes the covariate for Apolipoprotein-E allele genotype, “MMSE” denotes  
257 the score from the Mini-Mental State Examination, “Tobacco” denotes history of tobacco  
258 smoking (positive or negative), “Amyloid” indicates the status for amyloid-beta pathology  
259 as assessed on cerebrospinal fluid and/or positron-emission tomography (positive or  
260 negative), and “Tau” indicates the status for tau pathology as assessed on  
261 cerebrospinal fluid and/or positron-emission tomography (positive or negative).

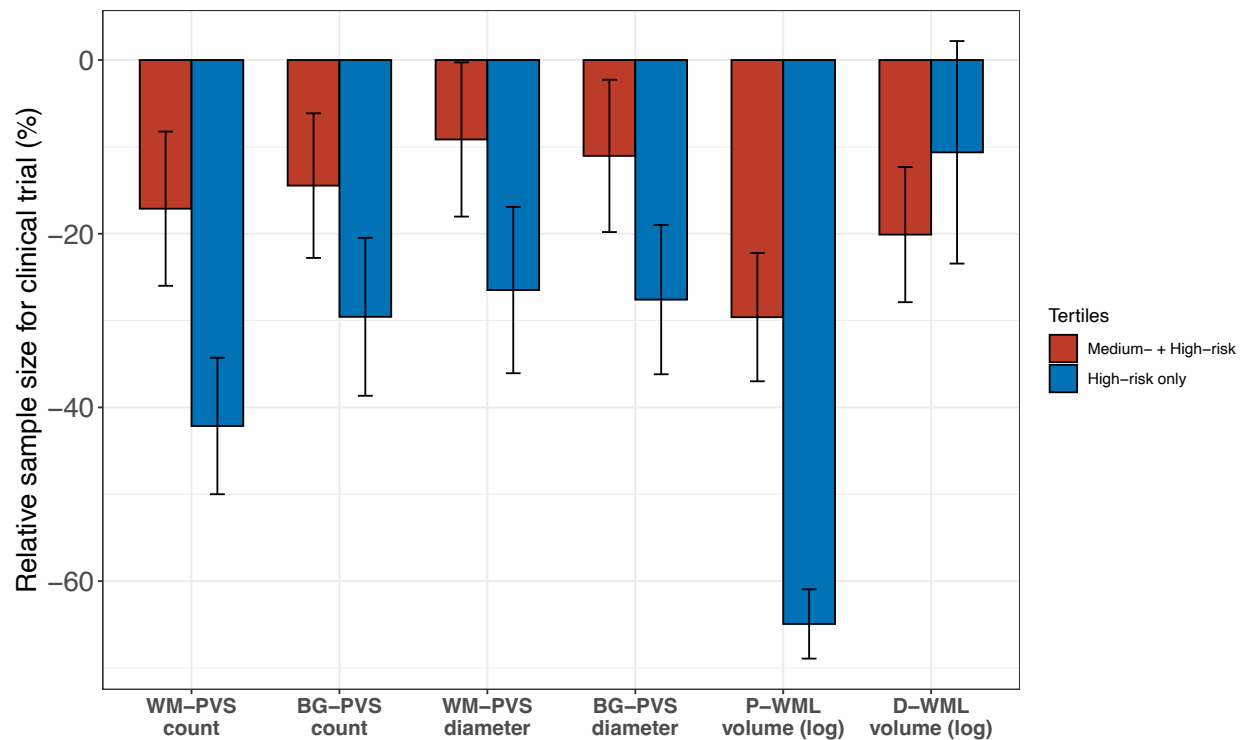

263  
264 **Figure S14. Barplots for the relative sample size estimation in simulated clinical**  
265 **trials enriched using PVS or WML markers.**

266 Relative sample sizes for simulated clinical trials in non-demented individuals (i.e.,  
267 MMSE score above 24) pooled from three studies (the Alzheimer Disease  
268 Neuroimaging Initiative, the Open Access Series of Imaging Studies, and the National  
269 Alzheimer's Coordinating Center). The simulations had statistical power of 80% at  $\alpha =$   
270 .05 and assumed a 30% treatment effect for slopes in cognitive decline, 1:1 allocation of  
271 treatment, total trial length of 48 months, and outcome measures every 12 months.  
272 Relative sample sizes and standard errors are across 500 bootstrap iterations of  
273 hypothetical trials. All available longitudinal cognitive data were used in these models  
274 adjusted for age. The reference model (without enrichment and with 100% inclusion)  
275 included all the tertiles. In the two enrichment models for each marker ("middle-  
276 risk+high-risk tertiles", red bars; "high-risk only tertile", blue bars), only participants in  
277 the indicated tertiles were included. Tertile limits for each marker are reported in Table  
278 S16.
